# Supplementary material
Source: PubMed Central journal article supplement (PMC5621628)
Supplement: NIHMS73569-supplement-Supplementary_Tables_2_and_3.pdf [file NIHMS73569-supplement-Supplementary_Tables_2_and_3.pdf]

**Supplementary Table 2. Yeast strains used in this study.**

| Strain | Genotype                                                                                                                                                                                                                                                                                                                                 | Fig                                                         |
|--------|------------------------------------------------------------------------------------------------------------------------------------------------------------------------------------------------------------------------------------------------------------------------------------------------------------------------------------------|-------------------------------------------------------------|
| YUK267 | <i>h<sup>+</sup> P<sub>nmt41</sub>-kan-slp1 ark1-as3-hph</i><br><i>Z-locus::natMX-P<sub>cnd3</sub>-cnd3-GFP</i>                                                                                                                                                                                                                          | Fig. S1f, S2c,<br>S4b-d, S6b,c                              |
| YUK421 | <i>h<sup>+</sup> P<sub>nmt41</sub>-kan-slp1 cnd2-HA-kan ade6</i>                                                                                                                                                                                                                                                                         | Fig. 4c,d, S8                                               |
| YUK585 | <i>h<sup>+</sup> P<sub>nmt41</sub>-kan-slp1 SV40-GFP-atb2-LEU2</i><br><i>nat-P<sub>nmt81</sub>-cnd3-IAA-ura4<sup>+</sup> his7 ura4-D18 his2</i><br><i>ade6::ade6<sup>+</sup>-P<sub>adh15</sub>-skp1-OsTIR1-bsd-P<sub>adh15</sub>-skp1-AtTIR1-2NLS</i>                                                                                    | Fig. S1b, S2c,<br>S4a,c,d, S6a,c                            |
| YUK621 | <i>h<sup>-</sup> nat-P<sub>nmt81</sub>-cut14-IAA-ura4<sup>+</sup> SV40-GFP-atb2-LEU2</i><br><i>ade6::ade6<sup>+</sup>-P<sub>adh15</sub>-skp1-OsTIR1-bsd-P<sub>adh15</sub>-skp1-AtTIR1-2NLS</i><br><i>P<sub>nmt41</sub>-kan-slp1ura4-D18</i>                                                                                              | Fig. 2a-d, 3, 4a,b,d,<br>S1a,b, S2c, S5,<br>S7, S8c         |
| YUK628 | <i>h<sup>+</sup> SV40-GFP-atb2-LEU2 P<sub>nmt41</sub>-kan-slp1 ura4-D18 his2</i><br><i>ade6::ade6<sup>+</sup>-P<sub>adh15</sub>-skp1-OsTIR1-bsd-P<sub>adh15</sub>-skp1-AtTIR1-2NLS</i>                                                                                                                                                   | Fig. 1, 2a,c-e, 3, 4,<br>S1a, S2, S3, S4a,<br>S5, S7, S8a,b |
| YUK760 | <i>h<sup>+</sup> SV40-GFP-atb2-LEU2</i><br><i>P<sub>nmt41</sub>-kan-slp1 mis6-2mCherry-hph ura4-D18 his2</i><br><i>ade6::ade6<sup>+</sup>-P<sub>adh15</sub>-skp1-OsTIR1-bsd-P<sub>adh15</sub>-skp1-AtTIR1-2NLS</i>                                                                                                                       | Fig. 2e,f                                                   |
| YUK765 | <i>h<sup>+</sup> SV40-GFP-atb2-LEU2 nat-P<sub>nmt81</sub>-cut14-IAA-ura4<sup>+</sup></i><br><i>P<sub>nmt41</sub>-kan-slp1 mis6-2mCherry-hph ura4-D18 his2</i><br><i>ade6::ade6<sup>+</sup>-P<sub>adh15</sub>-skp1-OsTIR1-bsd-P<sub>adh15</sub>-skp1-AtTIR1-2NLS</i>                                                                      | Fig. 2e,f                                                   |
| YUK799 | <i>h<sup>-</sup> nat-P<sub>nmt81</sub>-cut14-IAA-ura4<sup>+</sup> P<sub>nmt41</sub>-kan-slp1</i><br><i>ChrII-3.6Mb::TetO-hphMX ChrI-1.95Mb::LacO-natMX6</i><br><i>TetR-tdTom::leu1+ LacI-eGFP::his7+ ura4-D18</i><br><i>ade6::ade6<sup>+</sup>-P<sub>adh15</sub>-skp1-OsTIR1-bsd-P<sub>adh15</sub>-skp1-AtTIR1-2NLS</i>                  | Fig.5b                                                      |
| YUK808 | <i>h<sup>-</sup> P<sub>nmt41</sub>-kan-slp1 TetR-tdTom::leu1+ LacI-eGFP::his7+</i><br><i>ChrII-3.6Mb::TetO-hphMX ChrI-1.95Mb::LacO-natMX6</i><br><i>lys1 ade6-M210</i>                                                                                                                                                                   | Fig.5, S9                                                   |
| YUK792 | <i>h<sup>-</sup> nat-P<sub>nmt81</sub>-cut14-IAA-ura4<sup>+</sup> P<sub>nmt41</sub>-kan-slp1</i><br><i>ade6::ade6<sup>+</sup>-P<sub>adh15</sub>-skp1-OsTIR1-bsd-P<sub>adh15</sub>-skp1-AtTIR1-2NLS</i><br><i>ChrI-1.95Mb::hphMX-TetO LacO::lys1<sup>+</sup></i><br><i>Z-locus::natMX-TetR-tdTom LacI-eGFP::his7<sup>+</sup> ura4-D18</i> | Fig. S1d,e                                                  |
| YUK804 | <i>h<sup>-</sup> P<sub>nmt41</sub>-kan-slp1 ChrI-1.95Mb::hphMX-TetO LacO::lys1<sup>+</sup></i><br><i>Z-locus::natMX-TetR-tdTom LacI-eGFP::his7<sup>+</sup></i><br><i>leu1 ura4 ade6-M210</i>                                                                                                                                             | Fig. S1d,e                                                  |

**Supplementary Table 3. PCR primer sequences used in this study.**

| Name  | Sequence                         | Figure  |
|-------|----------------------------------|---------|
| YK717 | <i>CAGGAAGAGATTGAGTCGACC</i>     | Fig. 3e |
| YK718 | <i>CTTTAATGCCTGACCAACCTC</i>     | Fig. 3e |
| YK719 | <i>ACACCAACACTTTCACCAGG</i>      | Fig. 3e |
| YK720 | <i>GCGTACATATCTTACTCAATTCGTC</i> | Fig. 3e |
| YK722 | <i>ATCTTCTTGGCCTTTGCTTAGA</i>    | Fig. 3e |
| YK724 | <i>GAGATTCAAAGGGACCGTAGTG</i>    | Fig. 3e |
| YK725 | <i>TGGAAAGCAAAGTGTGGTAGAG</i>    | Fig. 3e |
| YK728 | <i>GATTTGGTTGGCGTTGGTTATT</i>    | Fig. 3e |
| YK729 | <i>GGCAATAGGACGACCATCAA</i>      | Fig. 3e |
| YK731 | <i>GCATGGAGCGACCAAGAAA</i>       | Fig. 3e |
| YK377 | <i>CTTGGTATCCGTAGCGTTGTT</i>     | Fig. 2d |
| YK378 | <i>CGATGATGAGTGTTGACGAGAG</i>    | Fig. 2d |
| YK565 | <i>GTTGTAACTGGTTGCCTGAC</i>      | Fig. 2d |
| YK566 | <i>GTAATTAAGGCTGCTTGCTCTTT</i>   | Fig. 2d |
